# Supplementary material
Source: HighWire-hosted journal article supplement (http://www.jneurosci.org/highwire/filestream/601131/field_highwire_adjunct_files/0/Supplemental_Figure.pdf)

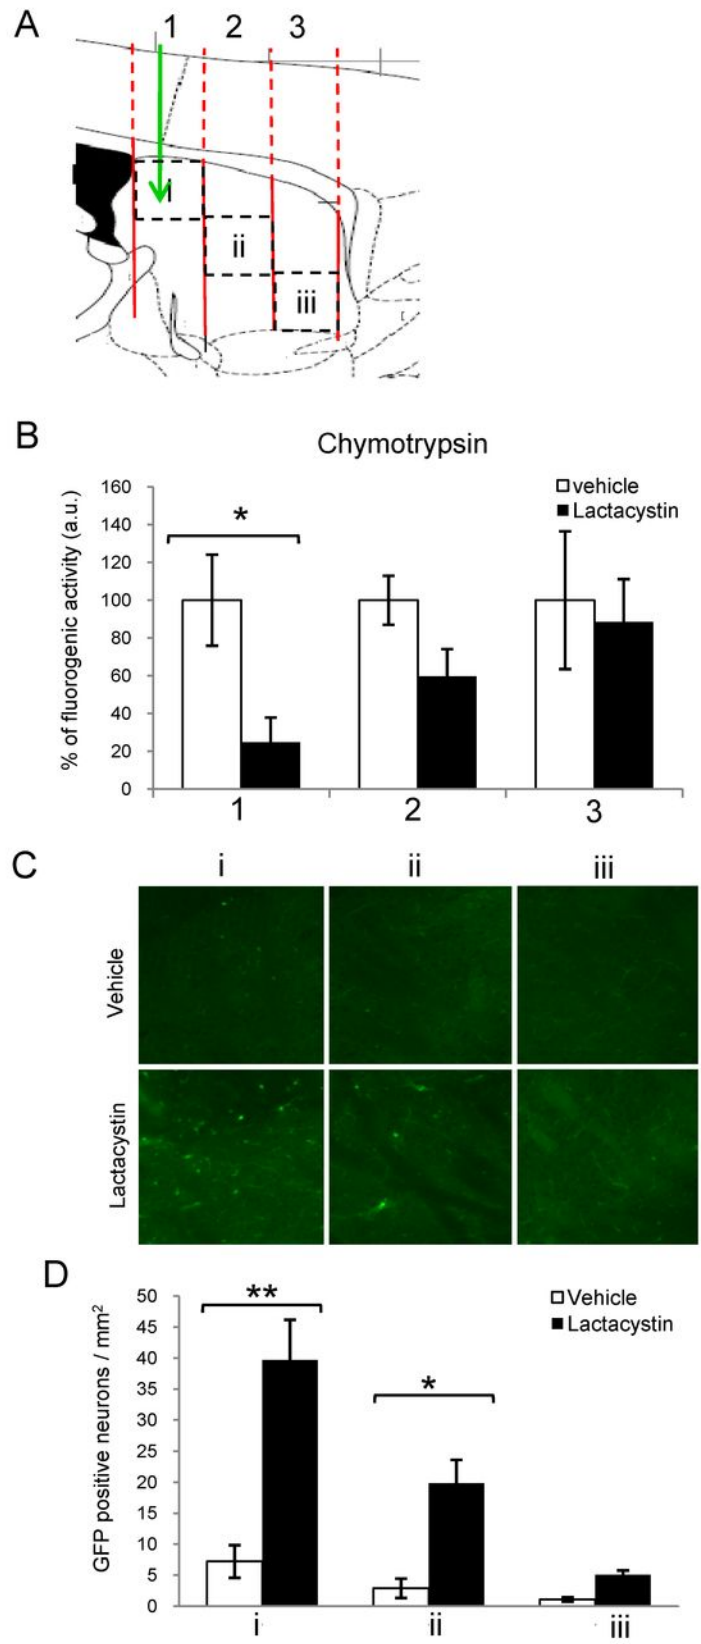

Ortega *et al.* Supplementary Figure 1

Supplement: Supplemental_Figure.pdf [file Supplemental_Figure.pdf]
